# Supplementary material for: An artificial intelligence based app for skin cancer detection evaluated in a population based setting
Source: PubMed Central journal article supplement (PMC10199884; doi:10.1038/s41746-023-00831-w), 2023-05-20
Supplement: 41746_2023_831_MOESM1_ESM.pdf [file 41746_2023_831_MOESM1_ESM.pdf]

## Supplementary material

**Supplemental table 1.** Proportion of dermatological healthcare claims for users of the mHealth app that have a positive medical history of skin cancer or premalignant skin lesions (n = 885) and their matched controls (n = 2,655).

|                                                | Matched controls<br>(n = 2,655) | mHealth-users<br>(n = 885) | p-value |
|------------------------------------------------|---------------------------------|----------------------------|---------|
| <b>Premalignant and malignant skin lesions</b> |                                 |                            |         |
| Premalignant skin lesions                      |                                 |                            |         |
| Percentage, % (n)                              | 25.46 (676)                     | 22.71 (201)                | 0.138   |
| OR (95% CI)                                    | Ref                             | 0.86 (0.71 - 1.03)         | 0.138   |
| Malignant skin lesions                         |                                 |                            |         |
| Percentage, % (n)                              | 56.12 (1490)                    | 51.41 (455)                | 0.041   |
| OR (95% CI)                                    | Ref                             | 0.83 (0.71 - 0.97)         | 0.041   |
| <b>Nevi and Benign skin tumors</b>             |                                 |                            |         |
| Nevi                                           |                                 |                            |         |
| Percentage, % (n)                              | 4.56 (121)                      | 4.86 (43)                  | 0.782   |
| OR (95% CI)                                    | Ref                             | 1.07 (0.73 - 1.54)         | 0.782   |
| Benign skin tumors                             |                                 |                            |         |
| Percentage, % (n)                              | 2.15 (57)                       | 3.39 (30)                  | 0.087   |
| OR (95% CI)                                    | Ref                             | 1.60 (0.99 - 2.55)         | 0.087   |
| Unrelated dermatological claims                |                                 |                            |         |
| Percentage, % (n)                              | 13.71 (364)                     | 10.51 (93)                 | 0.041   |
| OR (95% CI)                                    | Ref                             | 0.73 (0.57 - 0.94)         | 0.041   |

Percentages are number of people with a claim per subcategory of claims. P-values are the difference in proportion of claims, calculated using a two proportions z-test or corresponding odds ratio's using Fisher's Exact Test for Count Data. Abbreviations: CI; confidence interval, OR; Odds Ratio, Ref; Reference.

**Supplemental Table 2.** Total amount of health care related costs per person per diagnosis group for users of the mHealth app (n = 18,960) and a matched cohort (n = 56,880) in the year 2019. Mean costs and 95% confidence interval are reported, the median for all groups was zero.

|                                 | Matched controls,<br>mean (95%CI) (€)<br>(n = 56,880) | mHealth-users,<br>mean (95%CI) (€)<br>(n = 18,960) | Difference in €<br>(95%CI) | p-value |
|---------------------------------|-------------------------------------------------------|----------------------------------------------------|----------------------------|---------|
| Premalignant skin lesions       | 4.56 (4.09 - 5.04)                                    | 6.01 (5.12 - 6.90)                                 | 1.45 (0.44 - 2.46)         | 0.007   |
| Malignant skin lesions          | 16.32 (15.13 - 17.51)                                 | 25.01 (22.52 - 27.49)                              | 8.69 (5.93 - 11.44)        | < 0.001 |
| Benign skin tumors              | 1.03 (0.87 - 1.20)                                    | 2.88 (2.44 - 3.33)                                 | 1.85 (1.38 - 2.32)         | < 0.001 |
| Nevi                            | 2.71 (2.44 - 2.98)                                    | 11.05 (10.08 - 12.03)                              | 8.34 (7.34 - 9.35)         | < 0.001 |
| Unrelated dermatological claims | 18.47 (17.44 - 19.49)                                 | 20.01 (17.89 - 22.14)                              | 1.54 (-0.81 - 3.91)        | 0.211   |
| Total                           | 43.09 (41.40 - 44.79)                                 | 64.97 (61.38 - 68.56)                              | 21.88 (17.90 - 25.85)      | < 0.001 |

Costs are mean costs per person for each subcategory based on the number and types of claims multiplied with costs derived from the open DIS data, presented separately for mHealth-users and matched controls. Median for all groups was zero due to the low number of patients with a claim. P-values are based on the difference in mean costs, calculated using an unpaired two-sided t-test. Abbreviations: CI; confidence interval.

**Supplemental Figure 1.** Boxplot of the distribution of costs per type of claim for a subgroup of mHealth-users who had at least one dermatological claim and controls who had at least one dermatological claim in the year 2019.

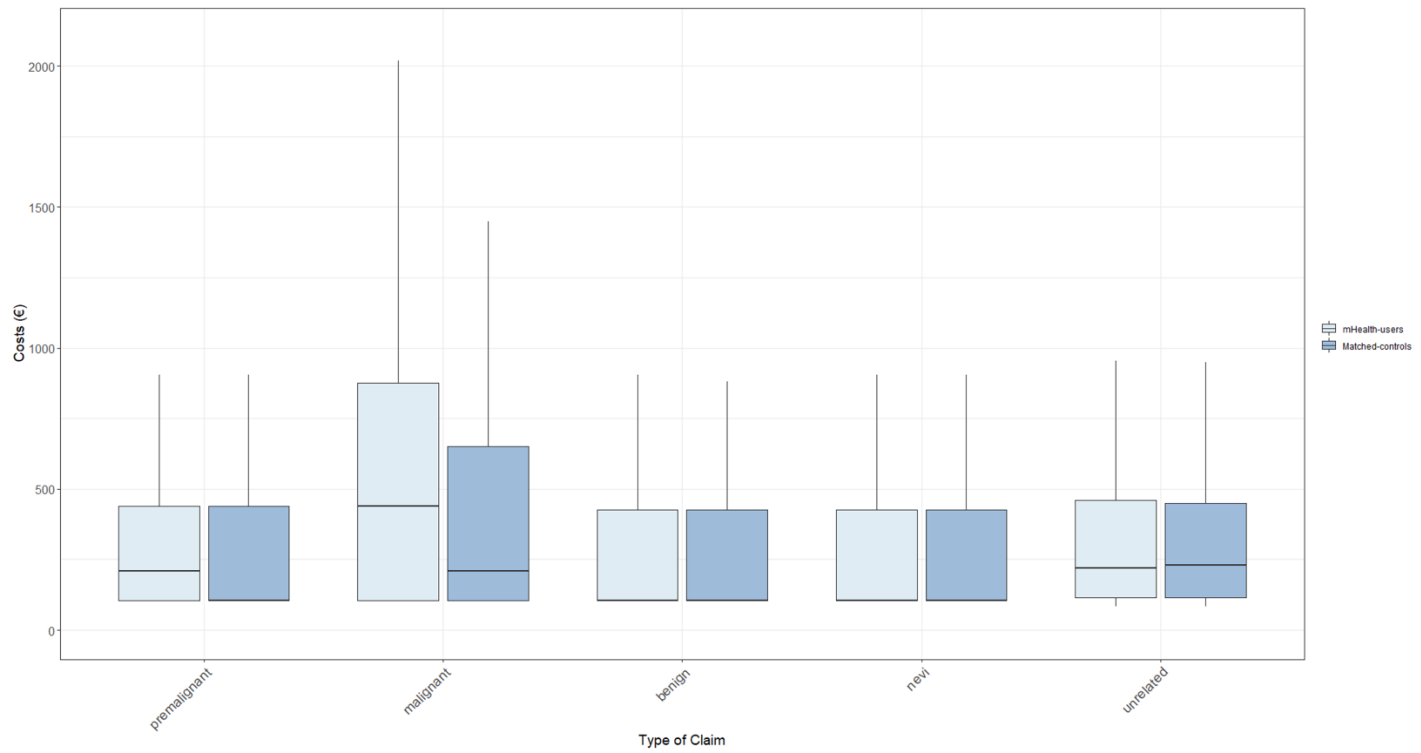

Boxes represent the median costs and interquartile range.

**Supplemental Table 3.** Total amount of healthcare related costs per person for a subgroup of mHealth-users who had at least one dermatological claim and controls who had at least one dermatological claim in the year 2019.

|                                        | Matched controls         | mHealth-users            | p-value |
|----------------------------------------|--------------------------|--------------------------|---------|
| <b>Premalignant skin lesions</b>       |                          |                          |         |
|                                        | 896                      | 391                      |         |
| Number of persons (N)                  | 289.68 (265.84 - 313.52) | 291.48 (259.22 - 323.75) | 0.928   |
| Mean € (95% CI)                        |                          |                          |         |
| <b>Malignant skin lesions</b>          |                          |                          |         |
|                                        | 1785                     | 773                      |         |
| Number of persons (N)                  | 520.05 (490.53 - 549.58) | 613.36 (569.39 - 657.33) | <0.001  |
| Mean € (95% CI)                        |                          |                          |         |
| <b>Benign skin tumors</b>              |                          |                          |         |
|                                        | 279                      | 267                      |         |
| Number of persons (N)                  | 210.88 (188.74 - 233.02) | 204.79 (184.77 - 224.82) | 0.688   |
| Mean € (95% CI)                        |                          |                          |         |
| <b>Nevi</b>                            |                          |                          |         |
|                                        | 666                      | 850                      |         |
| Number of persons (N)                  | 231.38 (216.04 - 246.72) | 246.58 (232.18 - 260.97) | 0.156   |
| Mean € (95% CI)                        |                          |                          |         |
| <b>Unrelated dermatological claims</b> |                          |                          |         |
|                                        | 2798                     | 1001                     |         |
| Number of persons (N)                  | 375.38 (359.43 - 391.33) | 379.05 (345.86 - 412.24) | 0.845   |
| Mean € (95% CI)                        |                          |                          |         |
| <b>Total</b>                           |                          |                          |         |
|                                        | 6105                     | 3081                     |         |
| Number of persons (N)                  | 401.49 (401.49 - 414.10) | 399.80 (381.85 - 417.75) | 0.880   |
| Mean € (95% CI)                        |                          |                          |         |

Costs are mean costs per person for each subcategory based on the number and types of claims multiplied with costs derived from the open DIS data, presented separately for mHealth-users and matched controls. P-values are based on the difference in mean costs, calculated using an unpaired two-sided t-test. Abbreviations: CI; confidence interval.
